# Supplementary material
Source: PubMed Central journal article supplement (PMC8757658)

## Supporting Information

# Influence of Polymer Structure and Architecture on Drug Loading and Redox-triggered Release

*Peidong Wu,<sup>1</sup> Jingjing Gao,<sup>1,2</sup> Priyaa Prasad,<sup>1</sup> Kingshuk Dutta,<sup>1</sup> Pintu Kanjilal,<sup>1</sup> S.*

*Thayumanavan<sup>\*1,3,4</sup>*

<sup>1</sup>Department of Chemistry, University of Massachusetts, Amherst, Massachusetts 01003,  
USA

<sup>2</sup>Current address: Center for Nanomedicine, Department of Anesthesiology,  
Perioperative and Pain Medicine, Brigham and Women's Hospital, Boston, MA 02115

<sup>3</sup>Department of Biomedical Engineering, University of Massachusetts Amherst, Amherst,  
Massachusetts, USA

<sup>4</sup>Center for Bioactive Delivery, The Institute for Applied Life Sciences, University of  
Massachusetts Amherst, Amherst, Massachusetts, USA

\* Email: [thai@chem.umass.edu](mailto:thai@chem.umass.edu) (S.T.)

## Table of Contents

|                                                                  |          |
|------------------------------------------------------------------|----------|
| Figure S1 Polymer synthesis scheme                               | Page S3  |
| Table S1 Polymer synthesis feed ratio                            | Page S3  |
| Table S2 The amount of TCEP for crosslinking                     | Page S4  |
| Figure S2 Size distribution of empty nanogels                    | Page S4  |
| Figure S3 Size distribution of drug encapsulated nanogels        | Page S5  |
| Figure S4 TEM images of drug encapsulated nanogels               | Page S6  |
| Figure S5 Drug loading quantification calibration curve          | Page S7  |
| Figure S6 Drug loading capability of PBn and PBU nanogels        | Page S8  |
| Figure S7 Cytotoxicity of empty nanogels                         | Page S9  |
| Figure S8 Cytotoxicity of free drugs                             | Page S10 |
| Figure S9 Cytotoxicity of nanogels in SAO2 and HT1080 cells      | Page S10 |
| $^1\text{H}$ NMR and $^{13}\text{C}$ NMR of synthesized polymers | Page S11 |

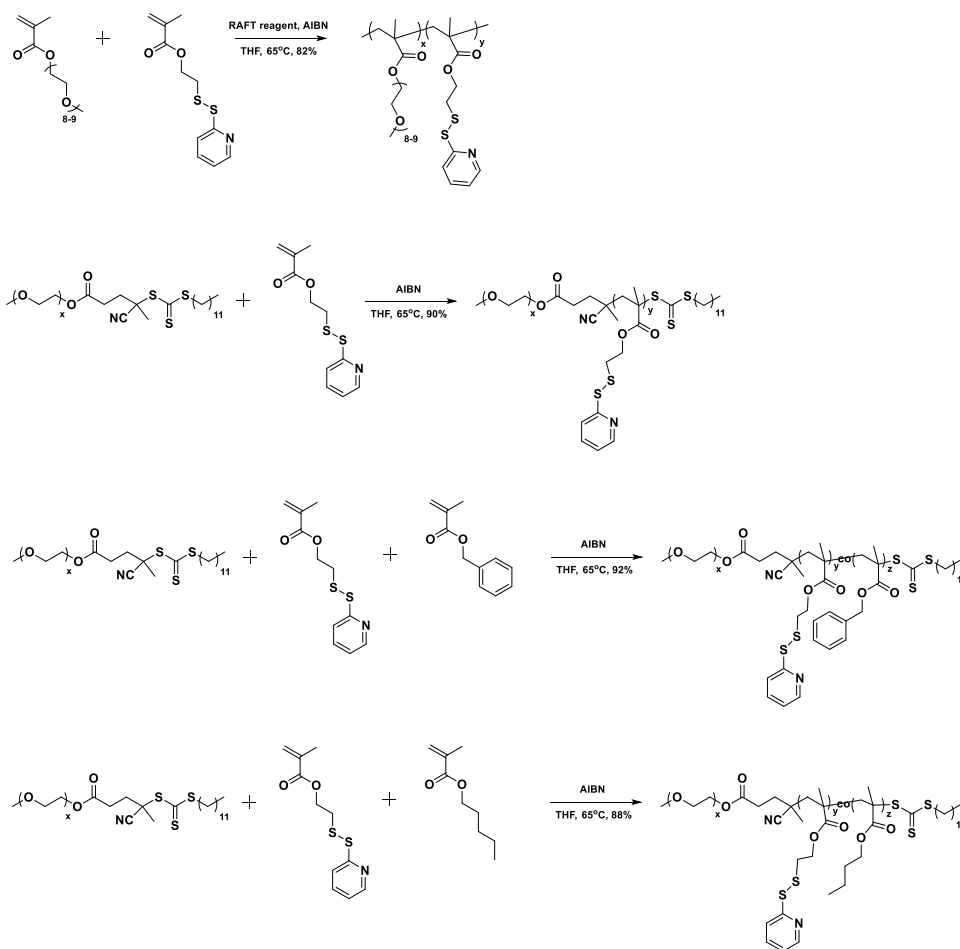

**Figure S1.** Synthesis route for random copolymers and block copolymers

**Table S1.** Feed ratio of polymer synthesis

| Polymer              | Raft (mg)    | PDSMA (mg)     | PEGMA (mg)  | BnMA (mg)    | BuMA (mg)    | AIBN (mg)     | Yield(%) |
|----------------------|--------------|----------------|-------------|--------------|--------------|---------------|----------|
| BCP <sub>1000</sub>  | 100 (1 eq)   | 182.4 (10 eq)  | -           | -            | -            | 2.35 (0.2 eq) | 77       |
| BCP <sub>5000</sub>  | 200 (1 eq)   | 94.58 (10 eq)  | -           | -            | -            | 1.22 (0.2 eq) | 82       |
| BCP <sub>10000</sub> | 200 (1 eq)   | 51.07 (10 eq)  | -           | -            | -            | 0.66 (0.2 eq) | 70       |
| RCP                  | 13.46 (2 eq) | 297.92 (70 eq) | 250 (30 eq) | -            | -            | 1.09 (0.4 eq) | 92       |
| PBn <sub>10</sub>    | 200 (1 eq)   | 82.12 (9 eq)   | -           | 6.53 (1 eq)  | -            | 1.22 (0.2 eq) | 87       |
| PBn <sub>60</sub>    | 200 (1 eq)   | 37.83 (4 eq)   | -           | 39.16 (6 eq) | -            | 1.22 (0.2 eq) | 85       |
| PBn <sub>80</sub>    | 200 (1 eq)   | 18.92 (2 eq)   | -           | 52.21 (8 eq) | -            | 1.22 (0.2 eq) | 83       |
| PBU <sub>10</sub>    | 200 (1 eq)   | 82.12 (9 eq)   | -           | -            | 5.27 (1 eq)  | 1.22 (0.2 eq) | 88       |
| PBU <sub>60</sub>    | 200 (1 eq)   | 37.83 (4 eq)   | -           | -            | 31.60 (6 eq) | 1.22 (0.2 eq) | 81       |
| PBU <sub>80</sub>    | 200 (1 eq)   | 18.92 (2 eq)   | -           | -            | 31.60 (8 eq) | 1.22 (0.2 eq) | 92       |

**Table S2.** Amount of TCEP for targeted crosslinking density

| 5mg Polymer         | n (PDS) (mmol)       | TCEP(25%) (mg) | TCEP(50%) (mg) | TCEP(100%) (mg) |
|---------------------|----------------------|----------------|----------------|-----------------|
| BCP <sub>5000</sub> | 0.00628 <sup>a</sup> | 0.225          | 0.451          | 0.901           |
| RCP                 | 0.01065 <sup>b</sup> | 0.381          | 0.763          | 1.526           |
| PBn <sub>10</sub>   | 0.00572              | 0.205          | 0.410          | 0.820           |
| PBn <sub>60</sub>   | 0.00268              | 0.096          | 0.192          | 0.384           |
| PBn <sub>80</sub>   | 0.00136              | 0.049          | 0.098          | 0.196           |
| PBu <sub>10</sub>   | 0.00572              | 0.205          | 0.410          | 0.820           |
| PBu <sub>60</sub>   | 0.00268              | 0.096          | 0.192          | 0.384           |
| PBu <sub>80</sub>   | 0.00136              | 0.049          | 0.098          | 0.196           |

- The amount of PDS moieties for block copolymers were calculated based on wt % that converted from the ratio between each monomer.
- The amount of PDS moieties for random copolymers were calculated following previous report<sup>1</sup>.

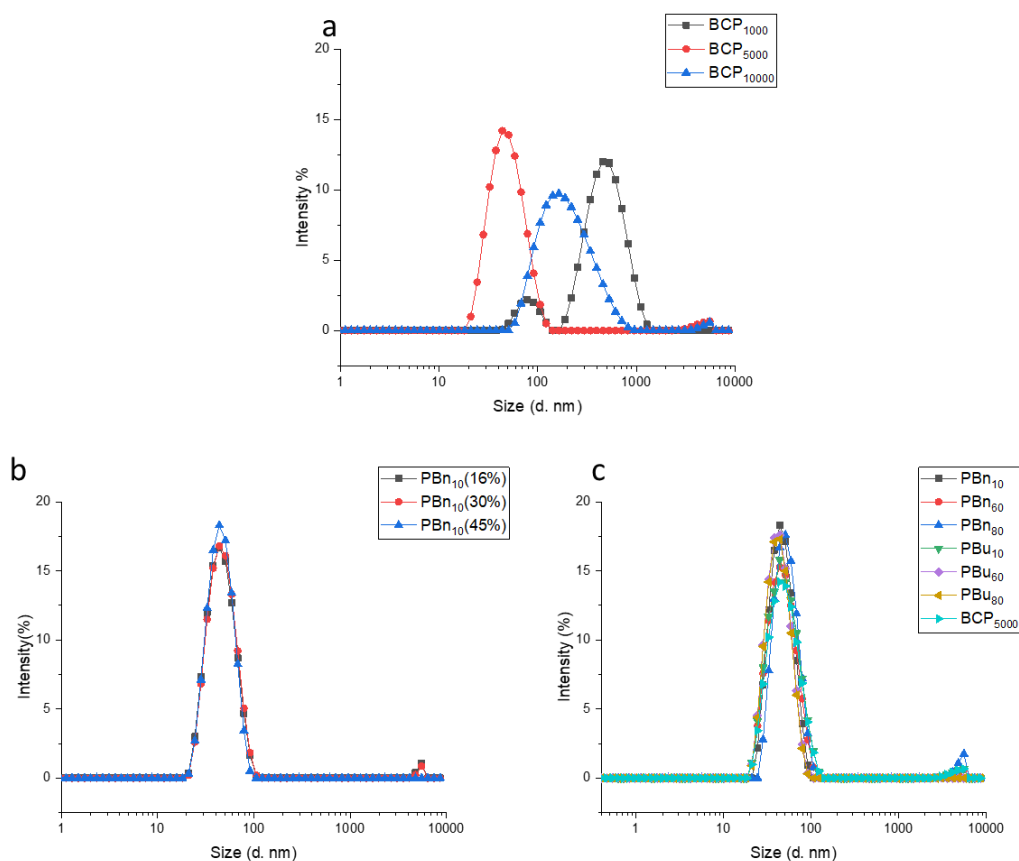

**Figure S2.** (a) The size distribution of BCP<sub>1000</sub>, BCP<sub>5000</sub>, BCP<sub>10000</sub> micelles; (b) The size distribution of PBn<sub>10</sub> control nanogels with 25%, 50%, and 100% crosslinking; (c) The size distribution of PBn<sub>10</sub>, PBn<sub>60</sub>, PBn<sub>80</sub>, PBu<sub>60</sub>, and BCP<sub>5000</sub> control nanogels at 25% crosslinking.

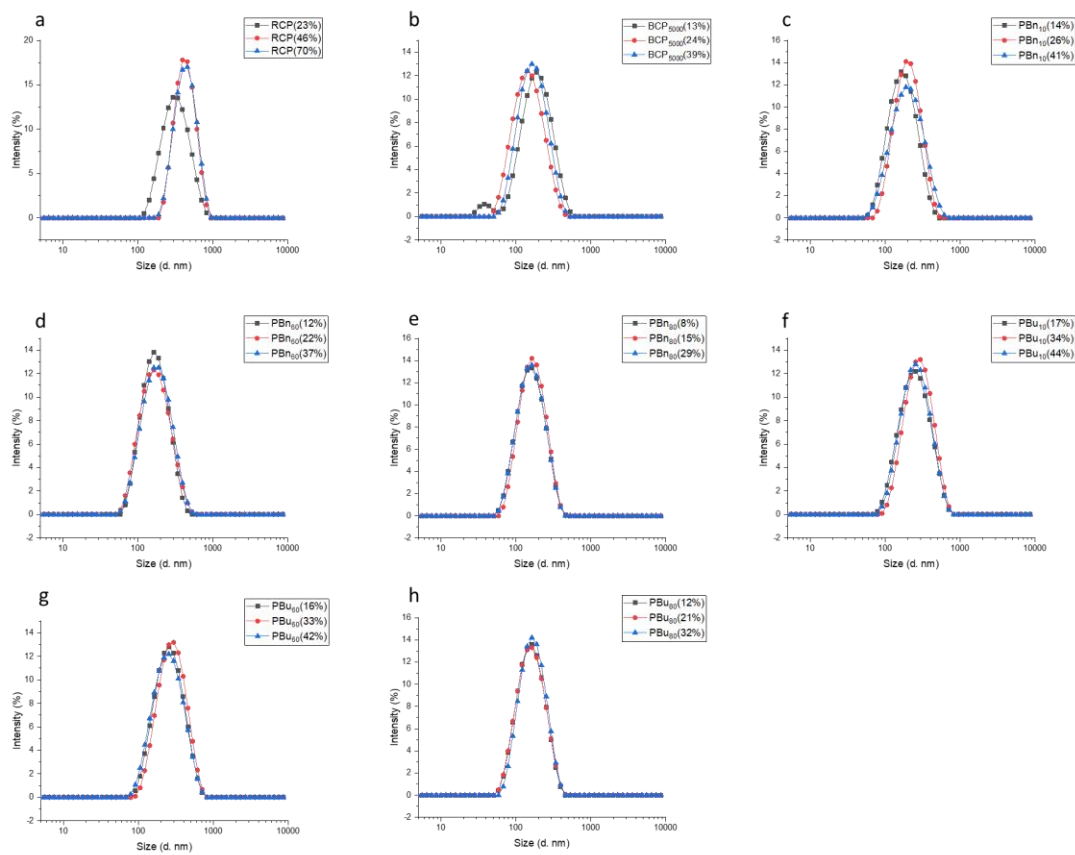

**Figure S3.** The size distribution of drug encapsulated nanogels with varied crosslinking density. (a)-(h): RCP, BCP<sub>5000</sub>, PBN<sub>10</sub>, PBN<sub>60</sub>, PBN<sub>80</sub>, PBU<sub>10</sub>, PBU<sub>60</sub>, PBU<sub>80</sub>.

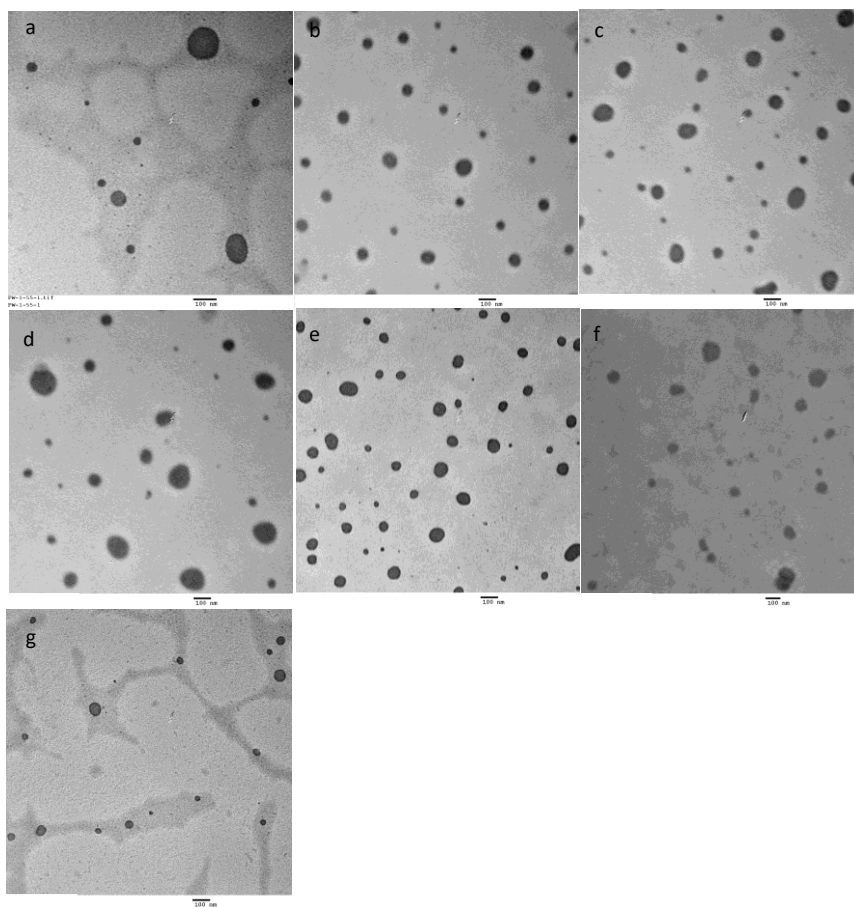

**Figure S4.** TEM images of drug encapsulated nanogels (a) BCP<sub>5000</sub>(24%); (b) PBn<sub>10</sub>(26%); (c) PBn<sub>60</sub>(22%); (d) PBn<sub>80</sub>(15%); (e) PBu<sub>10</sub>(34%); (f) PBu<sub>60</sub>(33%); (g) PBu<sub>80</sub>(21%). Scale bar 100 nm.

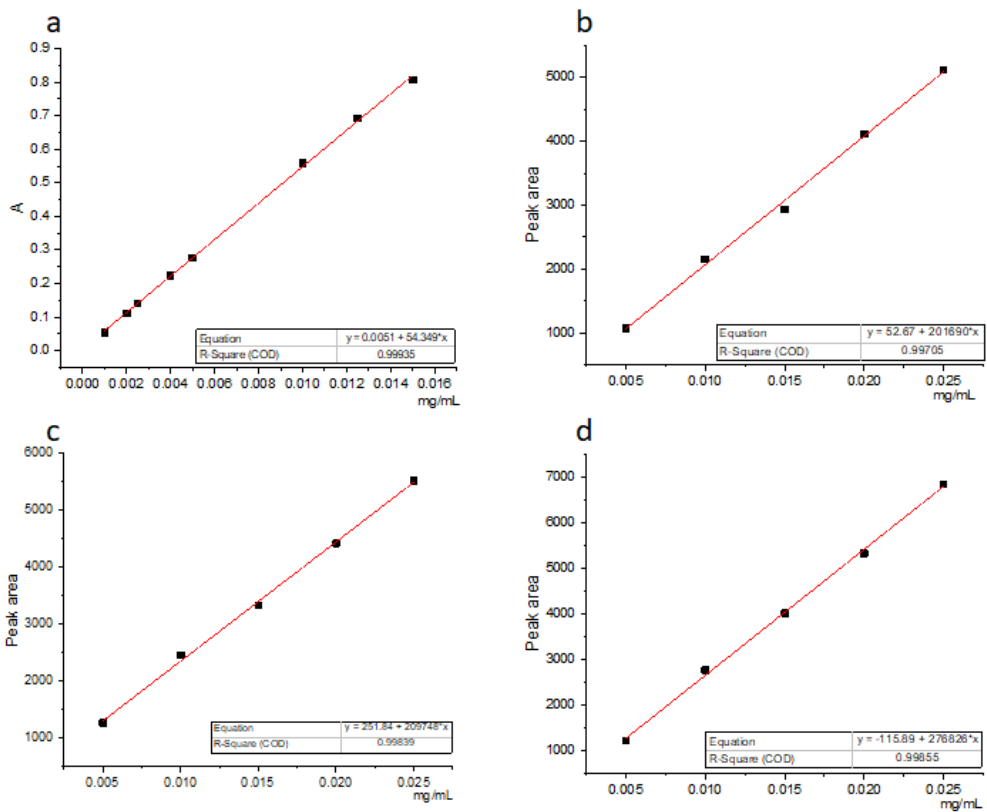

**Figure S5.** (a) Camptothecin standard plot at 365 nm in 90% (v/v) DMSO/water. (b) Paclitaxel standard plot using HPLC; (c) Docetaxel standard plot using HPLC; (d) Rapamycin standard plot using HPLC.

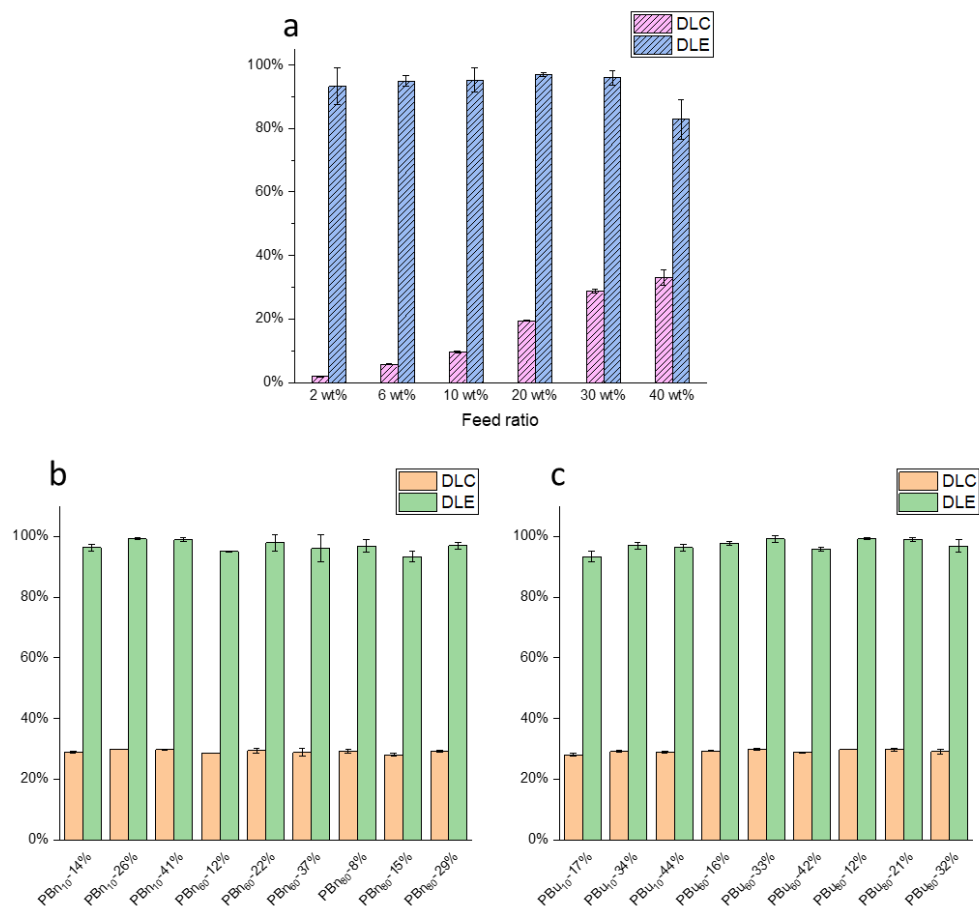

**Figure S6.** (a) Relationship between feed ratio and DLC/DLE; (b) DLC and DLE of PBn nanogels; (c) DLC and DLE of PBU nanogels.



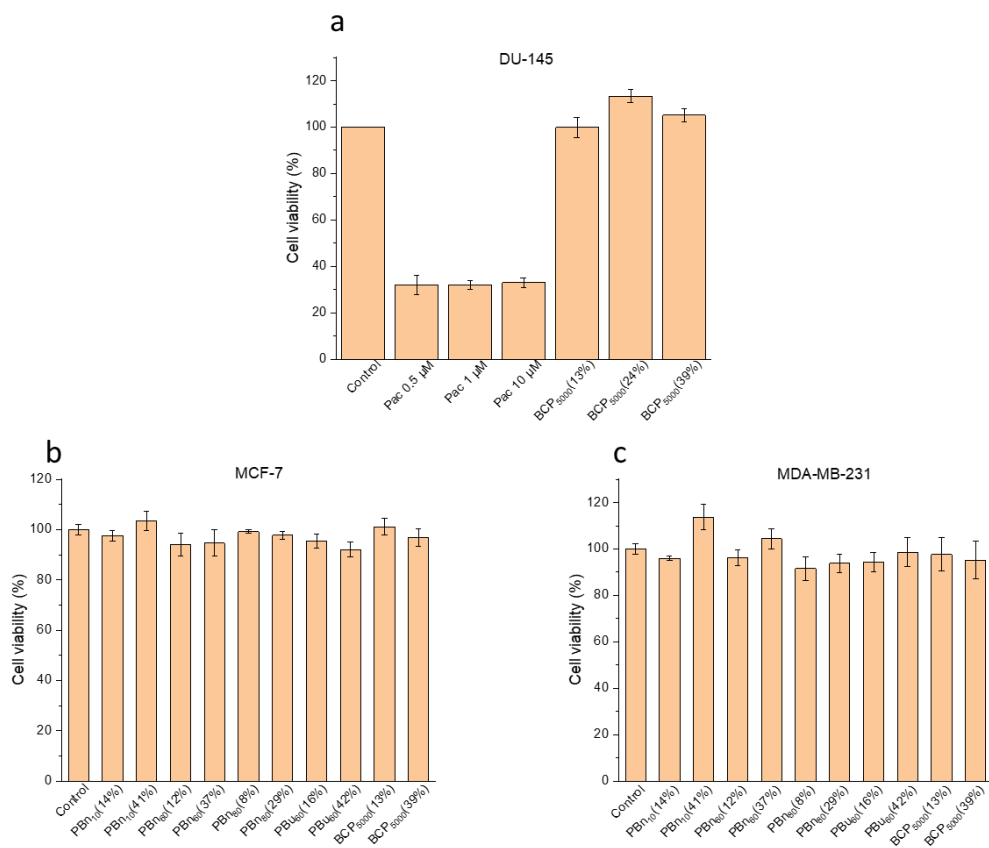

**Figure S7.** (a) DU-145 cell viability study with 0.5  $\mu$ M, 1  $\mu$ M, and 10  $\mu$ M paclitaxel and 0.1 mg/mL control nanogels. (b) MCF-7 cell viability study with 0.1 mg/mL control nanogels. (c) MDA-MB-231 cell viability study with 0.1 mg/mL control nanogels.

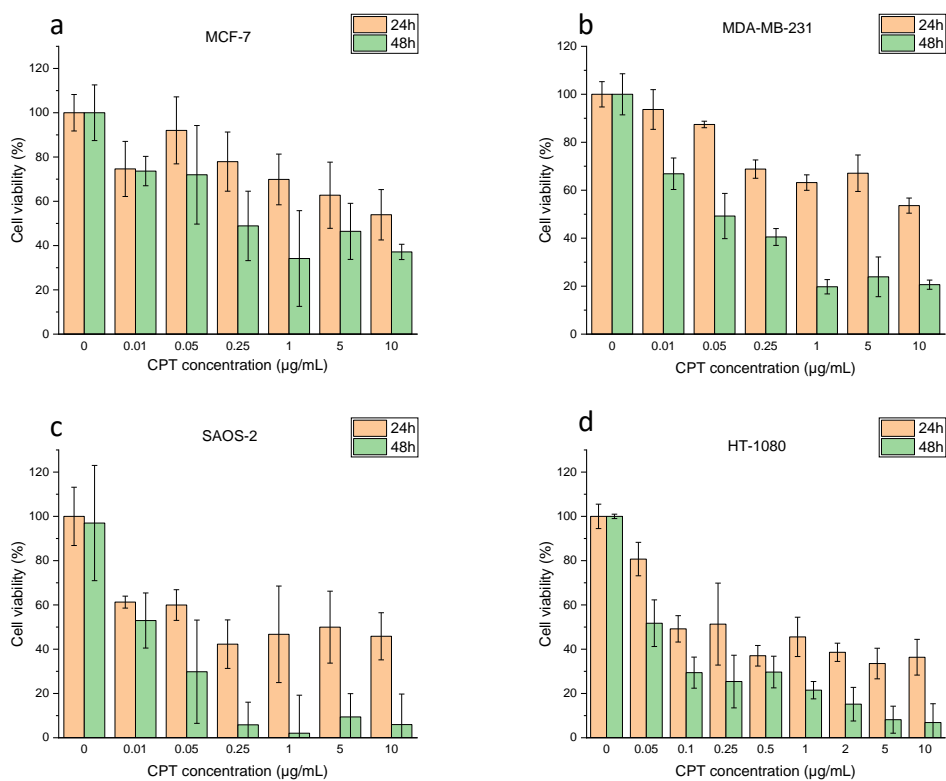

**Figure S8.** Free CPT cytotoxicity study in MCF-7 (a), MDA-MB-231 (b), SAOS-2 (c), and HT-1080 (d).

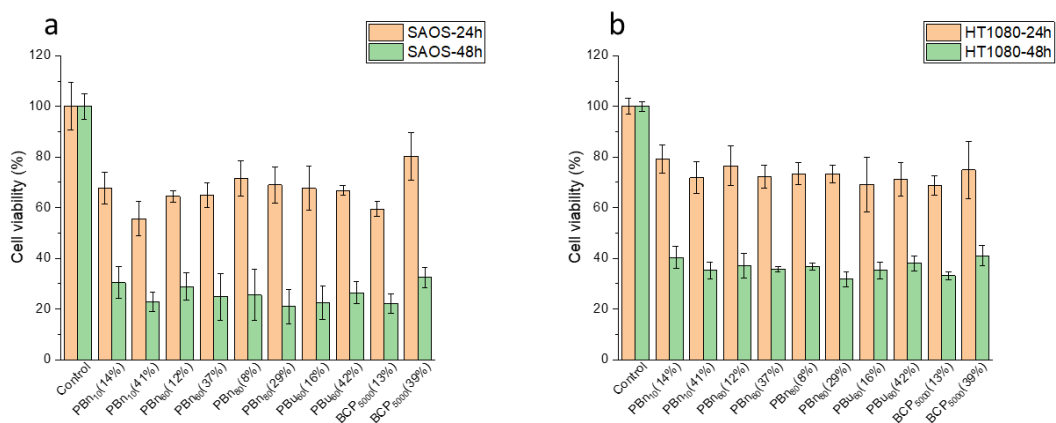

**Figure S9.** Cytotoxicity study of structural variant nanogels in SAOS-2 and HT-1080 cell lines (CPT concentration 0.05 µg/mL).

## **<sup>1</sup>H NMR and <sup>13</sup>C NMR of synthesized polymers**

**BCP<sub>1000</sub>** : <sup>1</sup>H NMR: (400 MHz, CDCl<sub>3</sub>), δ (ppm): 8.43, 7.62, 7.06, 4.19, 3.78-3.43, 3.35, 3.00, 2.14-1.7, 1.22, 1.03, 0.86. Integration of the methoxy proton (in PEG unit at 3.35 ppm) and the aromatic proton (in pyridine unit at 8.43 ppm) provided the molar ratio of two monomers to be 1:10 (PEG/PDS). <sup>13</sup>C NMR (101 MHz, CDCl<sub>3</sub>), δ(ppm): 159.6, 149.5, 137.4, 121.1, 119.9, 71.9, 70.0, 61.7, 58.7, 44.5, 36.6, 31.6, 29.4, 22.3, 14.1.

**BCP<sub>5000</sub>** : <sup>1</sup>H NMR (400 MHz, CDCl<sub>3</sub>) δ (ppm): 8.43, 7.63, 7.06, 4.20, 3.80-3.43, 3.36, 3.00, 2.99-1.83, 1.24, 1.22, 1.05, 0.86. Integration of the methoxy proton (in PEG unit at 3.35 ppm) and the aromatic proton (in pyridine unit at 8.43 ppm) provided the molar ratio of two monomers to be 1:10 (PEG/PDS). <sup>13</sup>C NMR (101 MHz, CDCl<sub>3</sub>), δ(ppm): 159.6, 149.8, 137.2, 121.0, 119.9, 72.6, 70.6, 61.7, 59.0, 44.8, 37.0, 31.6, 29.4, 22.7, 14.1.

**BCP<sub>10000</sub>** : <sup>1</sup>H NMR: (400 MHz, CDCl<sub>3</sub>), δ (ppm): 8.43, 7.62, 7.06, 4.19, 3.78-3.43, 3.35, 3.00, 2.14-1.7, 1.03, 0.86. Integration of the methoxy proton (in PEG unit at 3.35 ppm) and the aromatic proton (in pyridine unit at 8.43 ppm) provided the molar ratio of two monomers to be 1:10 (PEG/PDS). <sup>13</sup>C NMR (101 MHz, CDCl<sub>3</sub>), δ(ppm): 159.6, 149.5, 137.4, 121.1, 119.9, 71.9, 70.0, 61.7, 58.7, 44.5, 36.6, 31.6, 29.4, 22.3, 14.1.

**RCP** : <sup>1</sup>H NMR: (400 MHz, CDCl<sub>3</sub>), δ (ppm): 8.45, 7.66, 7.09, 4.21, 4.07, 3.63, 3.54, 3.37, 3.01, 1.83, 1.84, 1.05, 0.87. Integration of the methoxy proton (in PEG unit at 3.37 ppm) and the aromatic proton (in pyridine unit at 8.45 ppm) provided the molar ratio of two monomers to be 31:69 (PEG/PDS). <sup>13</sup>C NMR (101 MHz, CDCl<sub>3</sub>), δ(ppm): 159.4, 149.9, 137.1, 121.0, 119.9, 71.9, 70.7, 68.5, 62.7, 58.9, 44.8, 36.9, 31.8, 29.6, 22.8.

**PBn<sub>10</sub>** : Integration of the methoxy proton (in PEG unit at 3.38 ppm), the aromatic proton (in pyridine unit at 8.47 ppm), and the aromatic proton (in benzyl unit at 7.29) provided the molar ratio of three monomers to be 1: 9: 1 (PEG: PDS: Bn). <sup>13</sup>C NMR (101 MHz, CDCl<sub>3</sub>), δ(ppm): 159.60, 159.45, 149.77, 137.18, 128.60, 120.96, 119.92, 72.53, 71.95, 70.58, 69.00, 59.05, 44.84, 31.91, 29.62, 29.46, 29.34, 22.69, 14.15.

**PBn<sub>60</sub>** : <sup>1</sup>H NMR: (400 MHz, CDCl<sub>3</sub>), δ (ppm): 8.44, 7.62, 7.29, 7.26, 7.05, 4.91, 4.22, 3.78-3.49, 3.38, 2.96-1.76, 1.25, 1.25, 0.88, 0.73. Integration of the methoxy proton (in PEG unit at 3.38 ppm), the aromatic proton (in pyridine unit at 8.47 ppm), and the aromatic proton (in benzyl unit at 7.29) provided the molar ratio of three monomers to be 1: 4: 6 (PEG: PDS: Bn). <sup>13</sup>C NMR (101 MHz, CDCl<sub>3</sub>), δ(ppm): 149.78, 137.15, 135.08, 128.56, 71.95, 70.58, 66.82, 59.05, 44.76, 31.91, 29.62, 29.34, 22.69, 14.13.

**PBn<sub>80</sub>** : <sup>1</sup>H NMR (400 MHz, CDCl<sub>3</sub>) δ (ppm): 8.44, 7.61, 7.28, 7.05, 4.90, 4.87, 4.22, 4.21, 3.78, 3.64, 3.50, 3.38, 1.74, 1.25, 1.25, 1.24, 0.91, 0.89, 0.88, 0.72. Integration of the methoxy proton (in PEG unit at 3.38 ppm), the aromatic proton (in pyridine unit at 8.47 ppm), and the aromatic proton (in benzyl unit at 7.29) provided the molar ratio of three monomers to be 1: 2: 8 (PEG: PDS: Bn). <sup>13</sup>C NMR (101 MHz, CDCl<sub>3</sub>), δ(ppm): 137.10, 135.39, 135.09, 128.53, 128.40, 72.53, 71.95, 70.58, 59.05, 45.09, 31.91, 29.62, 29.45, 29.34, 22.69, 14.14.

**PBu<sub>10</sub>**: <sup>1</sup>H NMR (400 MHz, CDCl<sub>3</sub>) (ppm): δ 8.47, 7.67, 7.10, 4.23, 4.22, 3.93, 3.81, 3.64, 3.56, 3.47, 3.46, 3.38, 3.03, 1.91, 1.82, 1.71, 1.62, 1.38, 1.25, 1.04, 0.93, 0.88. Integration of the methoxy proton (in PEG unit at 3.38 ppm), the aromatic proton (in pyridine unit at 8.47 ppm), and the methylene proton next to ester group (in butyl unit at 3.93) provided the molar ratio of two monomers to be 1: 9 : 1 (PEG: PDS : Bu). <sup>13</sup>C NMR (101 MHz, CDCl<sub>3</sub>), δ(ppm): 149.79, 137.15, 72.58, 71.94, 70.57, 61.72, 59.04, 31.91, 30.20, 29.63, 29.34, 22.69, 19.34, 14.13.

**PBu<sub>60</sub>**: <sup>1</sup>H NMR (400 MHz, CDCl<sub>3</sub>) (ppm): δ 8.47, 7.67, 7.10, 4.23, 4.22, 3.93, 3.81, 3.64, 3.56, 3.47, 3.46, 3.38, 3.03, 1.91, 1.82, 1.71, 1.62, 1.38, 1.25, 1.04, 0.93, 0.88. Integration of the methoxy proton (in PEG unit at 3.38 ppm), the aromatic proton (in pyridine unit at 8.47 ppm), and the methylene proton next to ester group (in butyl unit at 3.93) provided the molar ratio of two monomers to be 1: 4 : 6 (PEG: PDS : Bu). <sup>13</sup>C NMR (101 MHz, CDCl<sub>3</sub>), δ(ppm): 149.79, 137.15, 72.58, 71.94, 70.57, 61.72, 59.04, 31.91, 30.20, 29.63, 29.34, 22.69, 19.34, 14.13.

**PBu<sub>80</sub>**: <sup>1</sup>H NMR (400 MHz, CDCl<sub>3</sub>) (ppm): δ 8.47, 7.67, 7.10, 4.23, 4.22, 3.93, 3.81, 3.64, 3.56, 3.47, 3.46, 3.38, 3.03, 1.91, 1.82, 1.71, 1.62, 1.38, 1.25, 1.04, 0.93, 0.88. Integration of the methoxy proton (in PEG unit at 3.38 ppm), the aromatic proton (in pyridine unit at 8.47 ppm), and the methylene proton next to ester group (in butyl unit at 3.93) provided the molar ratio of two monomers to be 1: 2 : 8 (PEG: PDS : Bu). <sup>13</sup>C NMR (101 MHz, CDCl<sub>3</sub>), δ(ppm): 149.79, 137.15, 72.58, 71.94, 70.57, 61.72, 59.04, 31.91, 30.20, 29.63, 29.34, 22.69, 19.34, 14.13.

BCP<sub>1000</sub> <sup>1</sup>H NMR and <sup>13</sup>C NMR

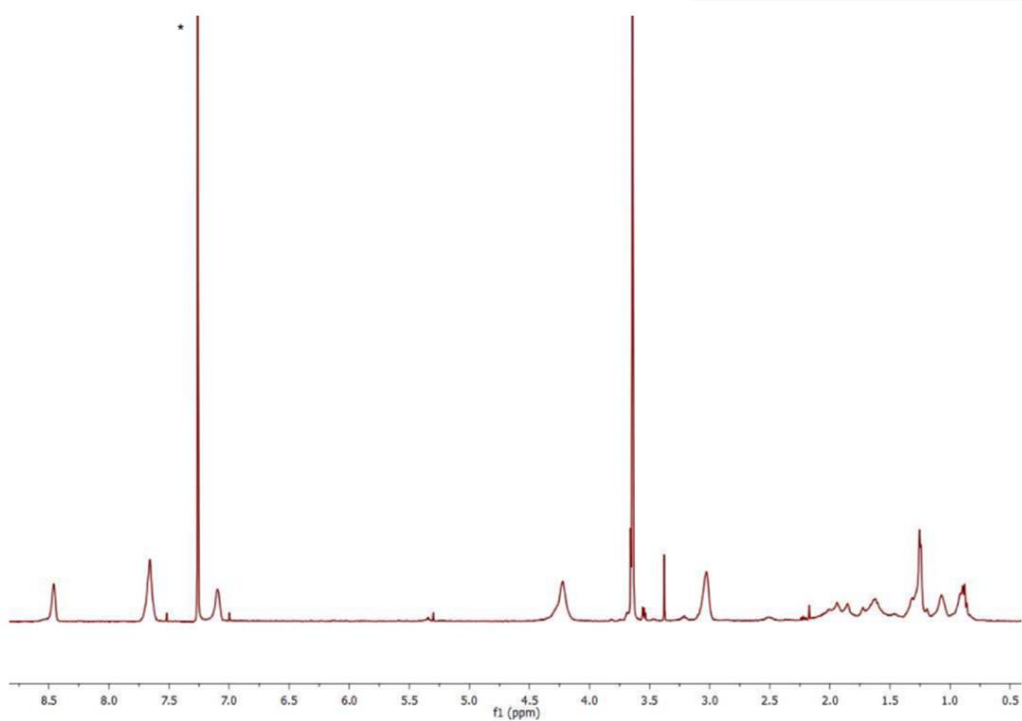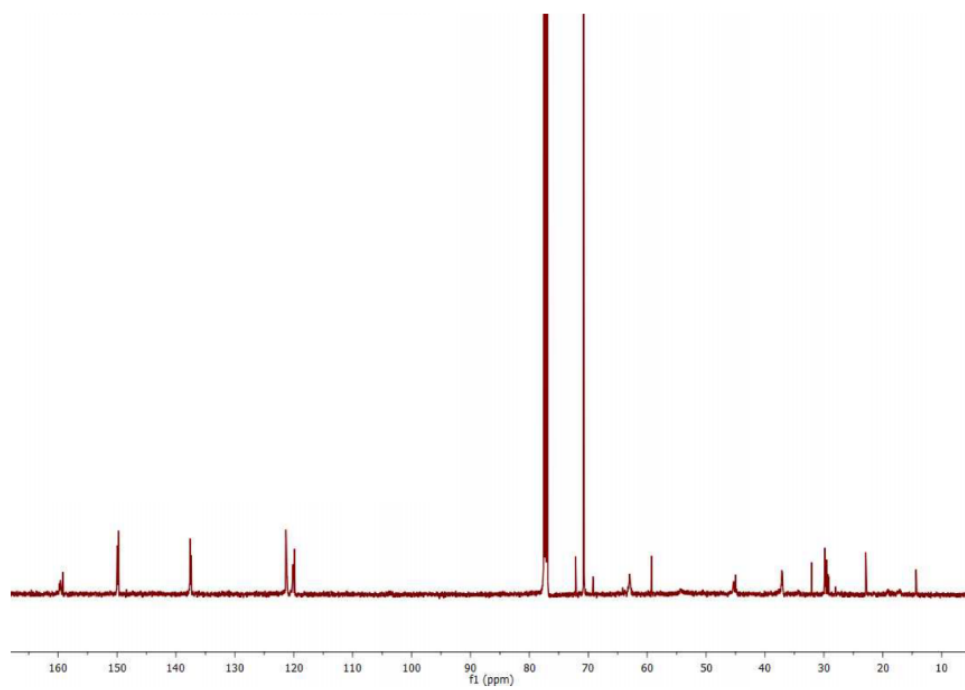

BCP<sub>5000</sub> <sup>1</sup>H NMR and <sup>13</sup>C NMR

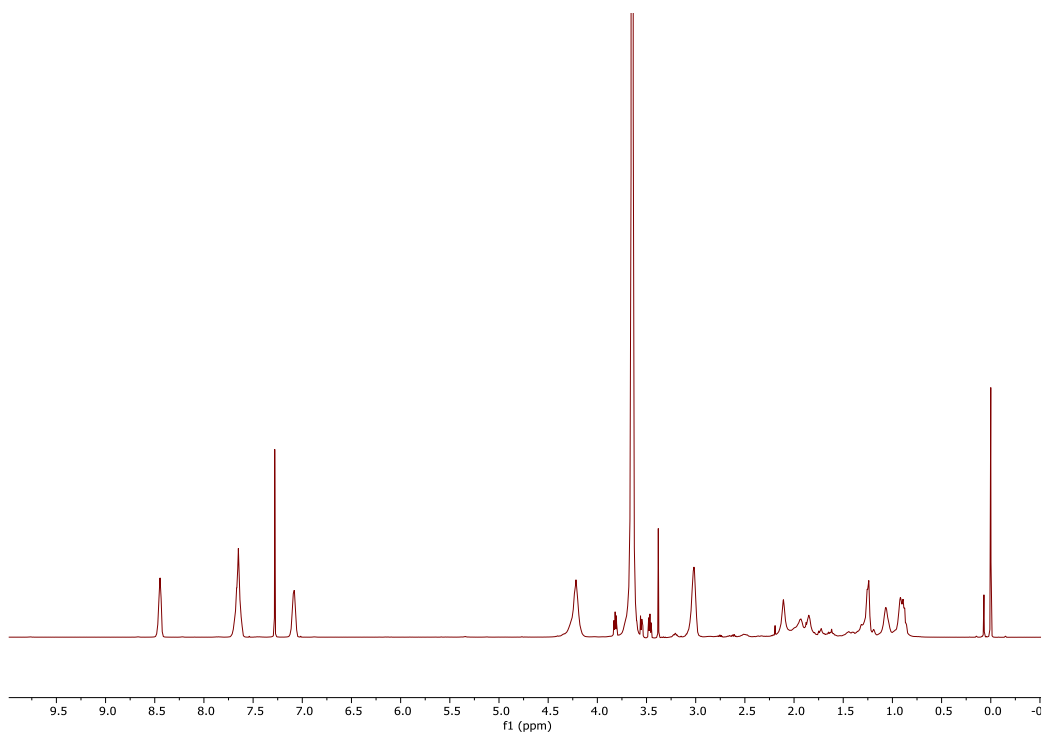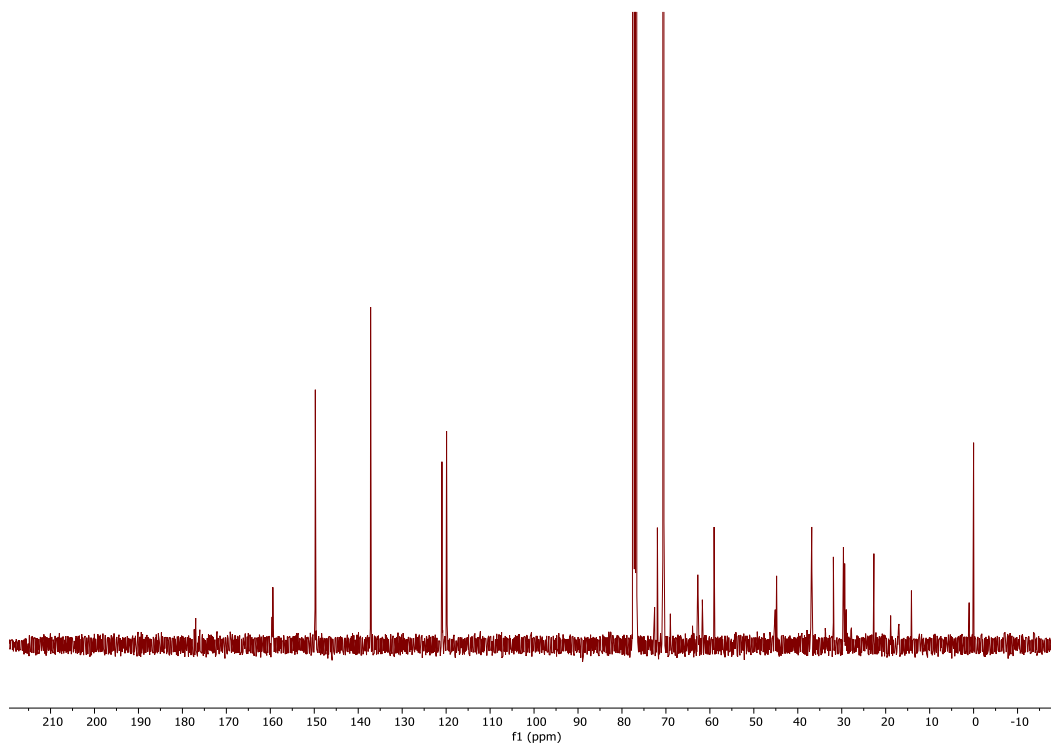

BCP<sub>10000</sub> <sup>1</sup>H NMR and <sup>13</sup>C NMR

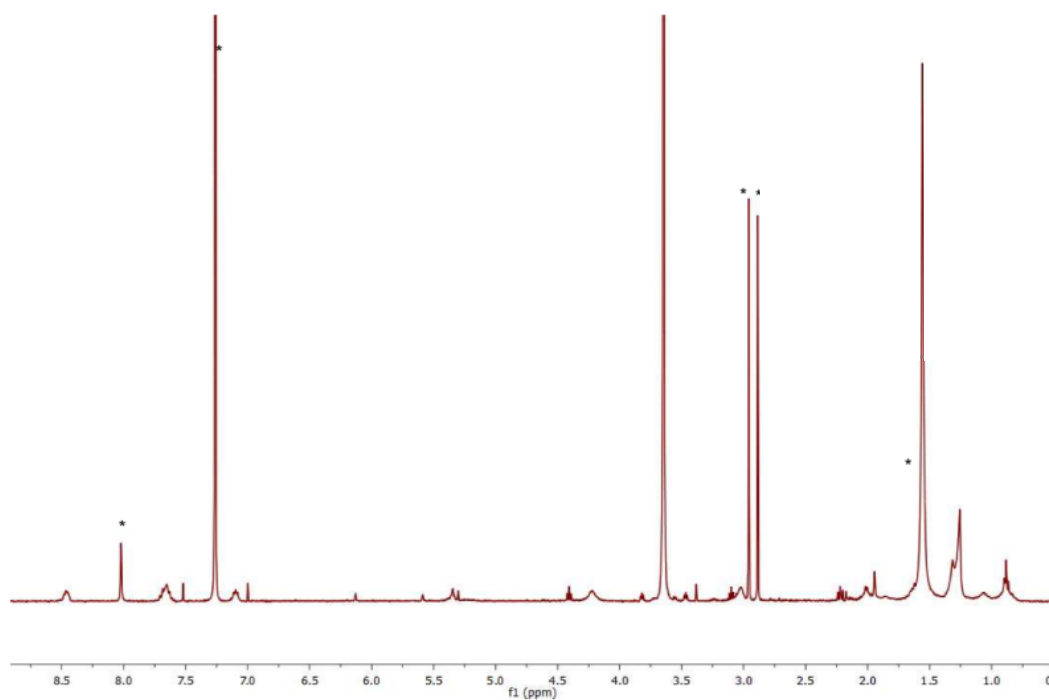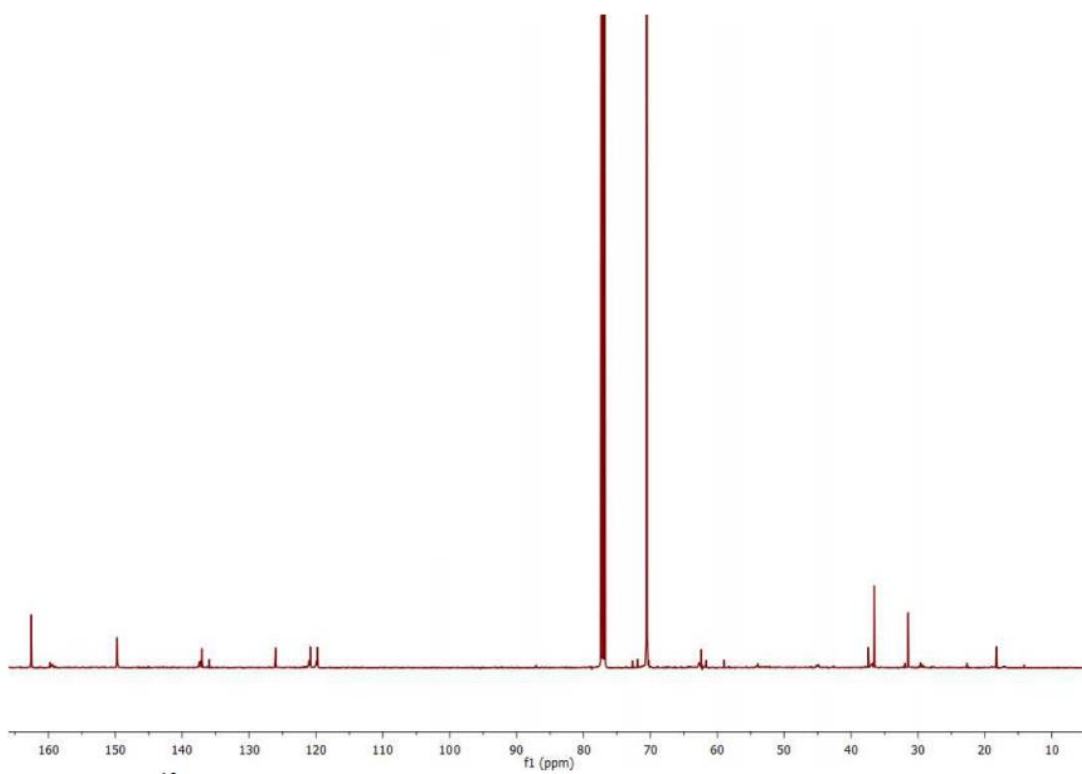

RCP  $^1\text{H}$  NMR and  $^{13}\text{C}$  NMR

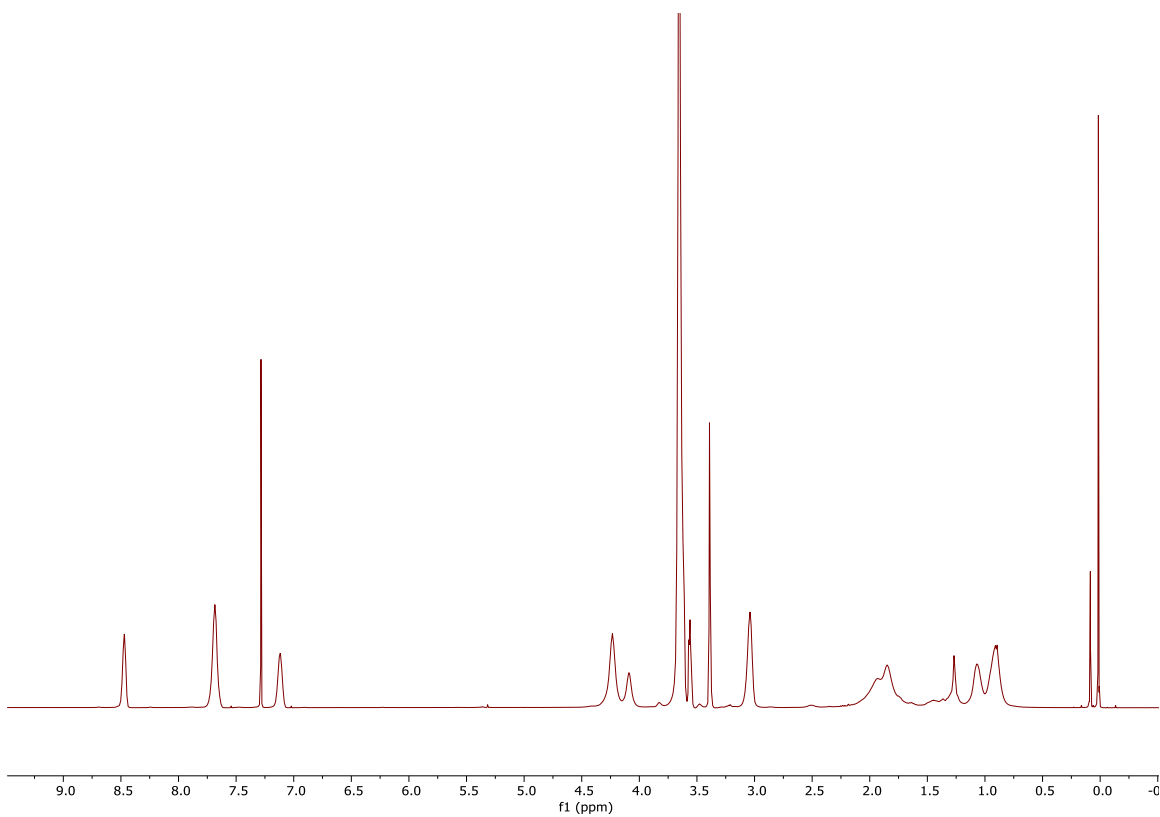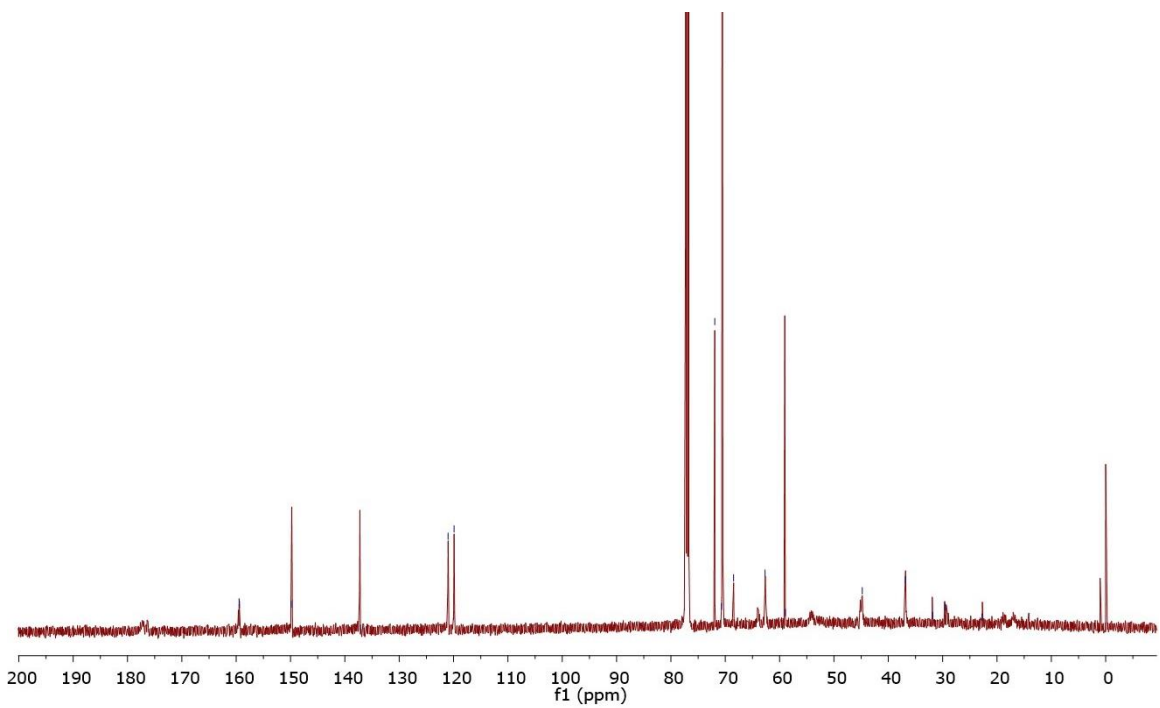



PBn<sub>10</sub> <sup>1</sup>H NMR and <sup>13</sup>C NMR

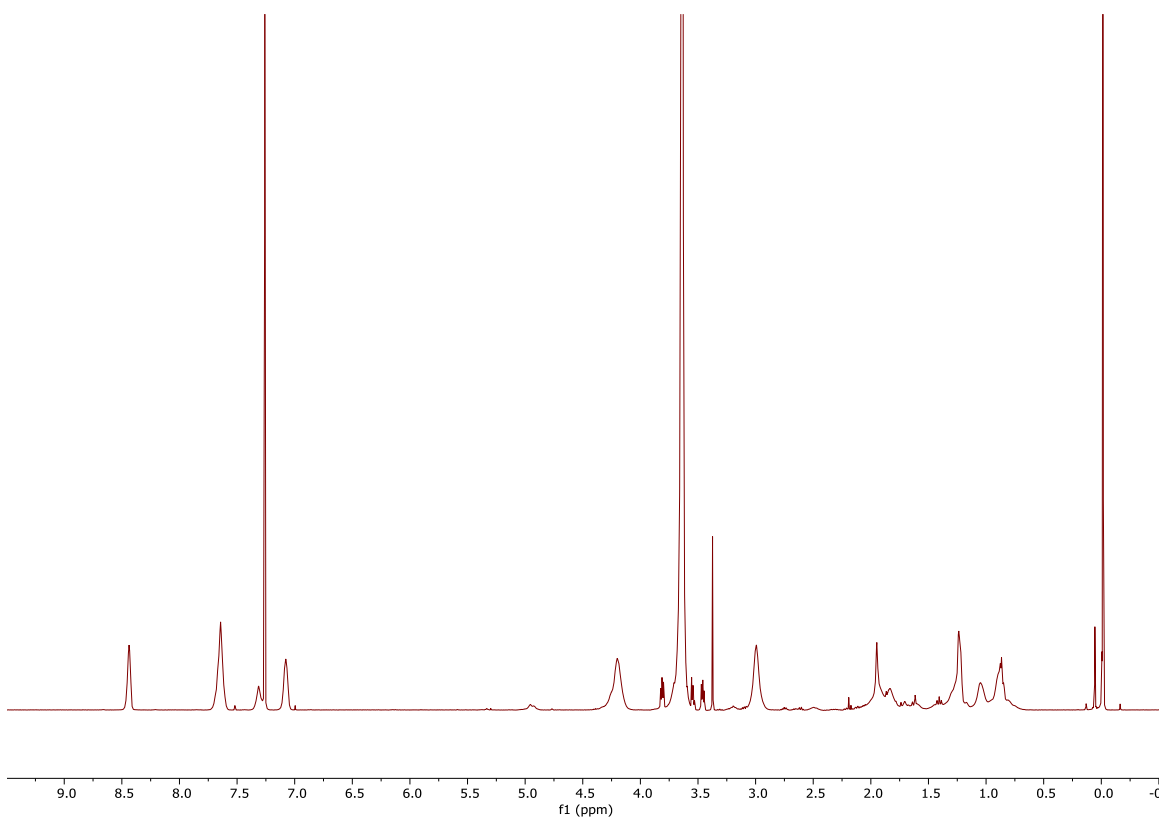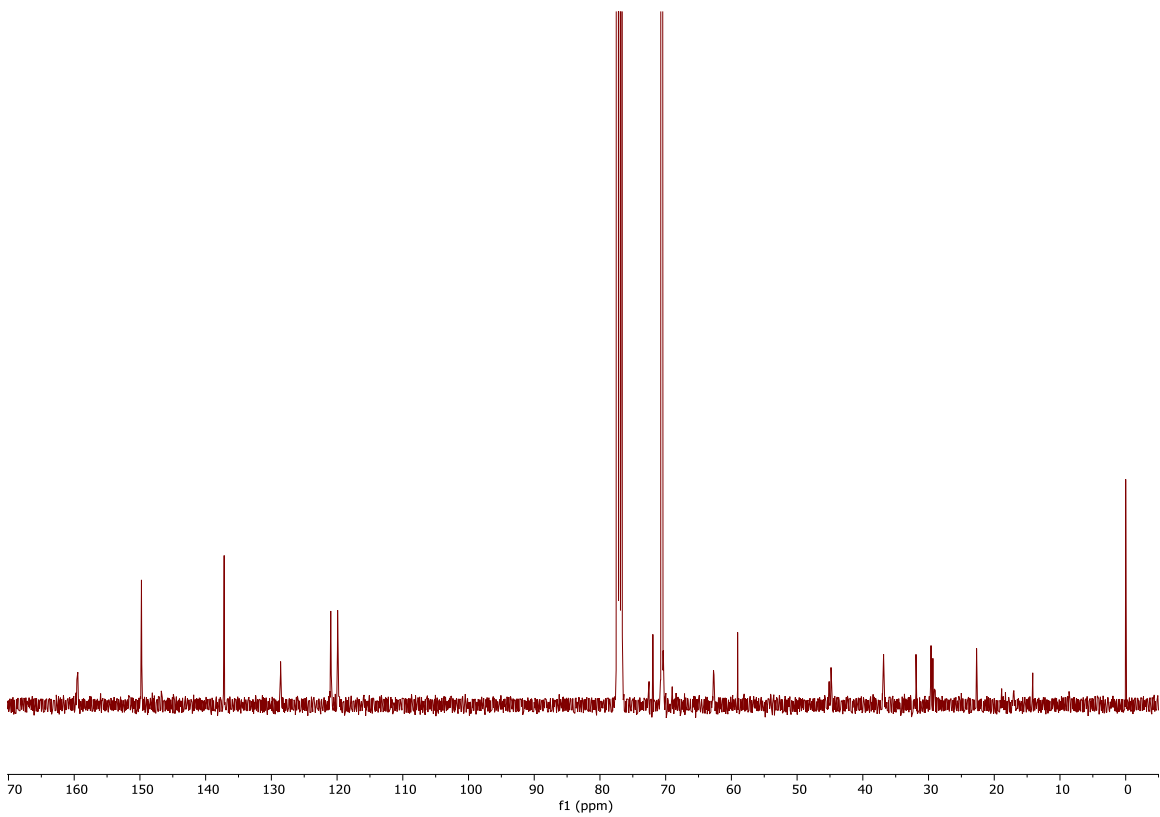

PBn<sub>60</sub> <sup>1</sup>H NMR and <sup>13</sup>C NMR

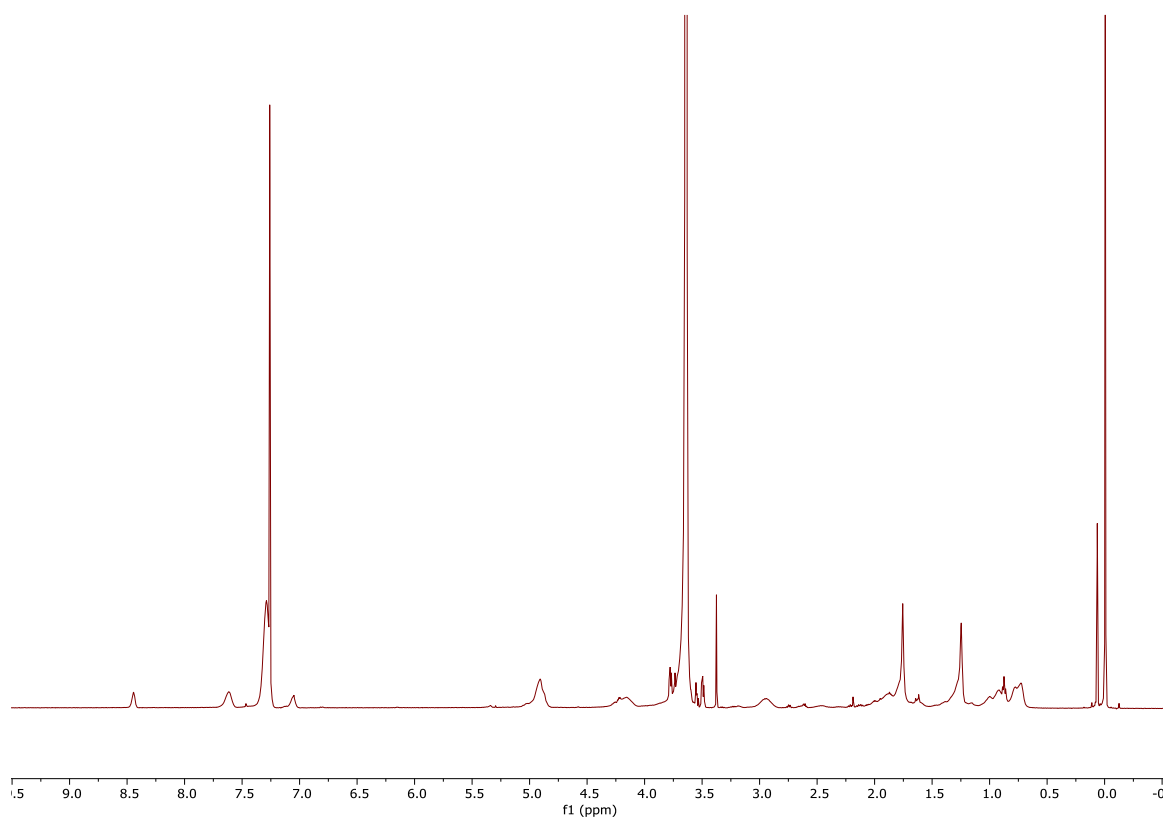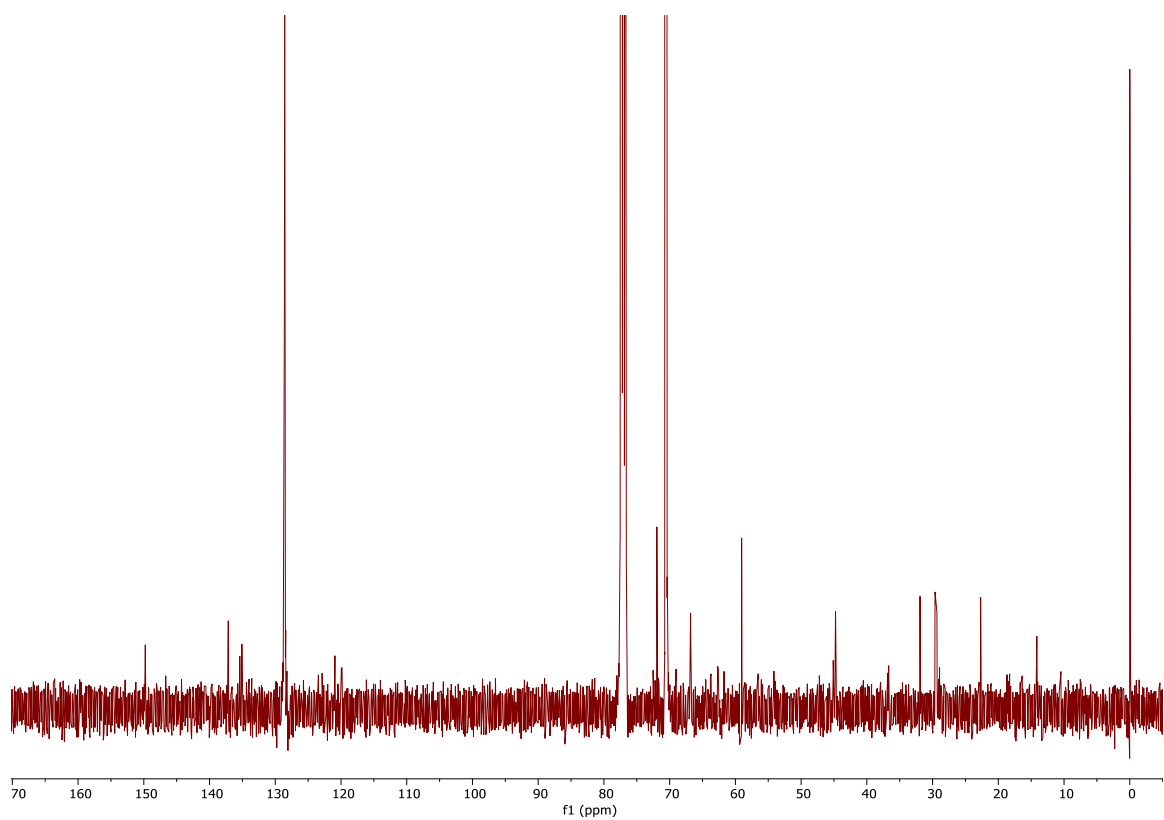

PBn<sub>80</sub> <sup>1</sup>H NMR and <sup>13</sup>C NMR

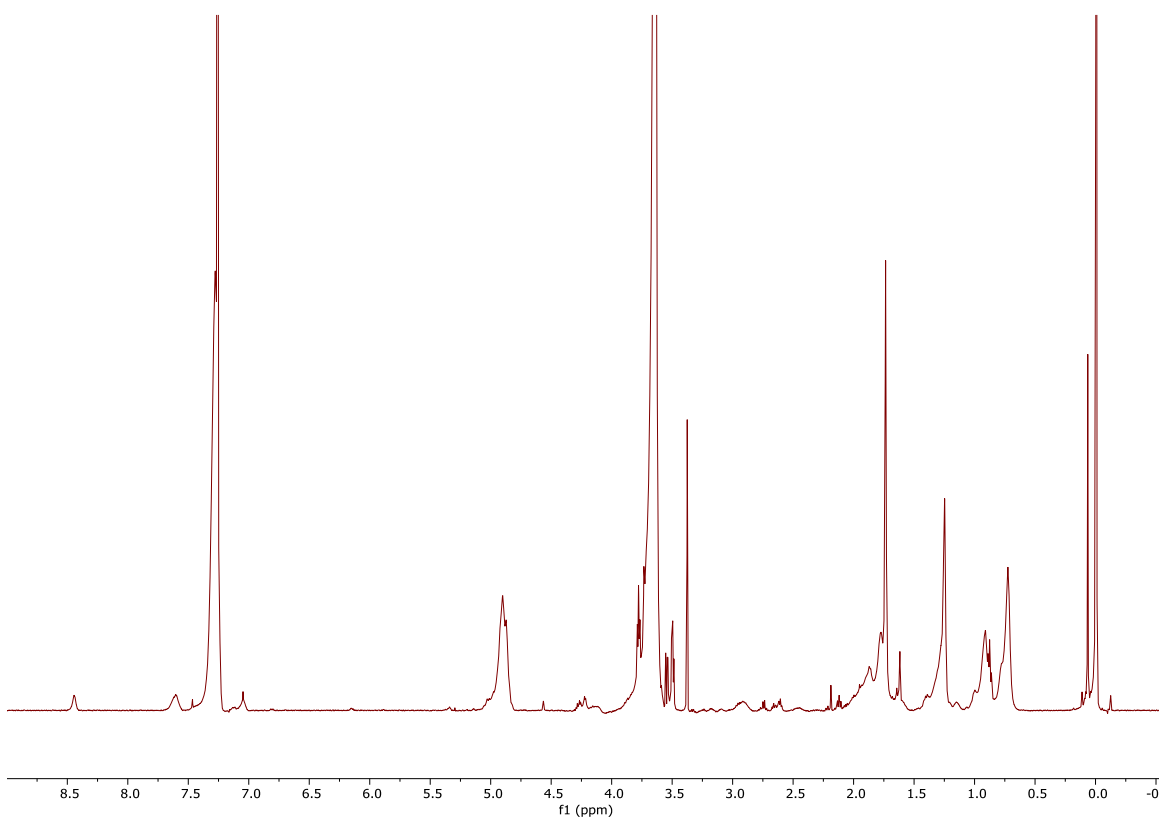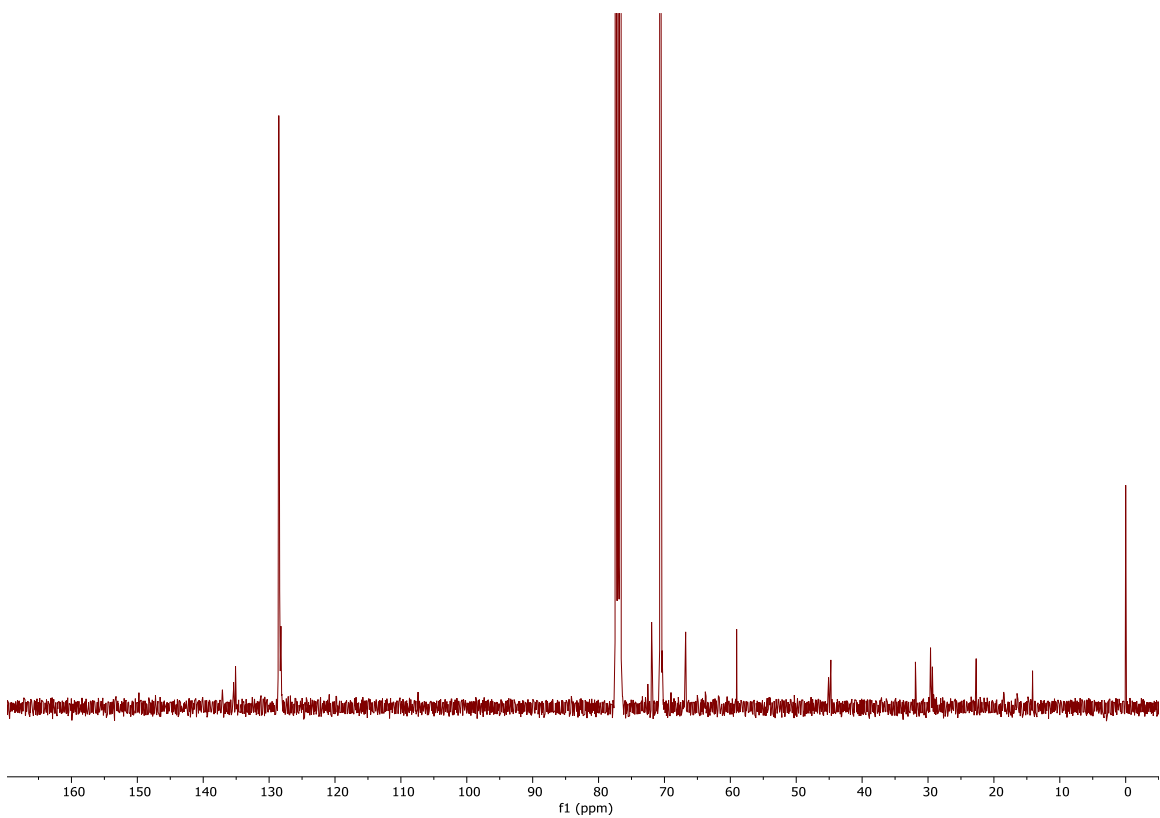

PBu<sub>10</sub> <sup>1</sup>H NMR and <sup>13</sup>C NMR

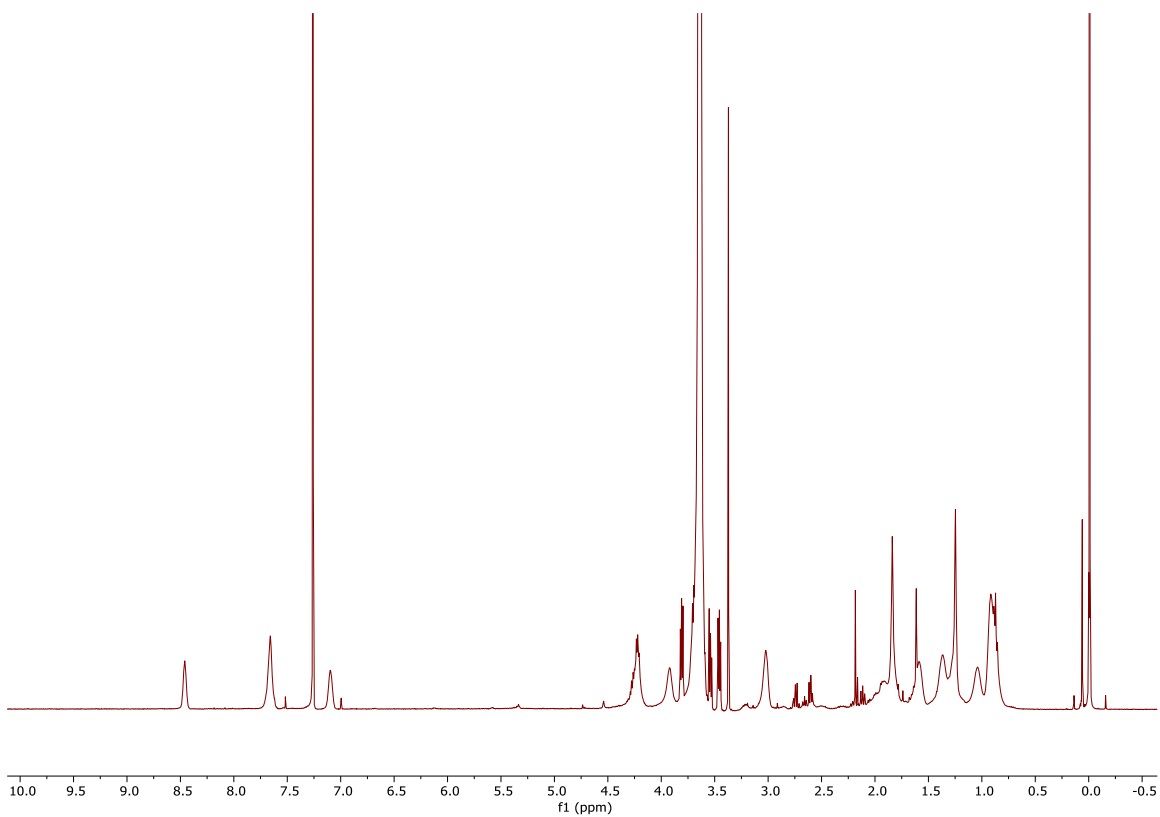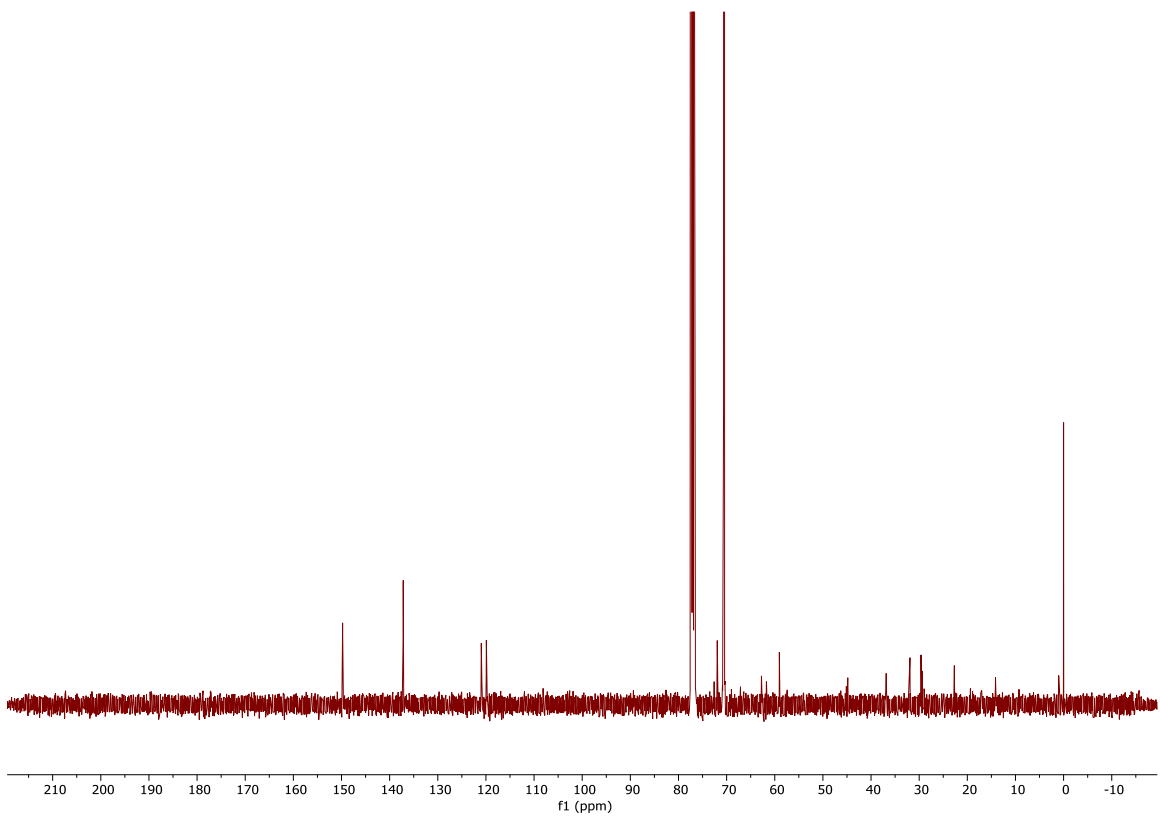

PBu<sub>60</sub> <sup>1</sup>H NMR and <sup>13</sup>C NMR

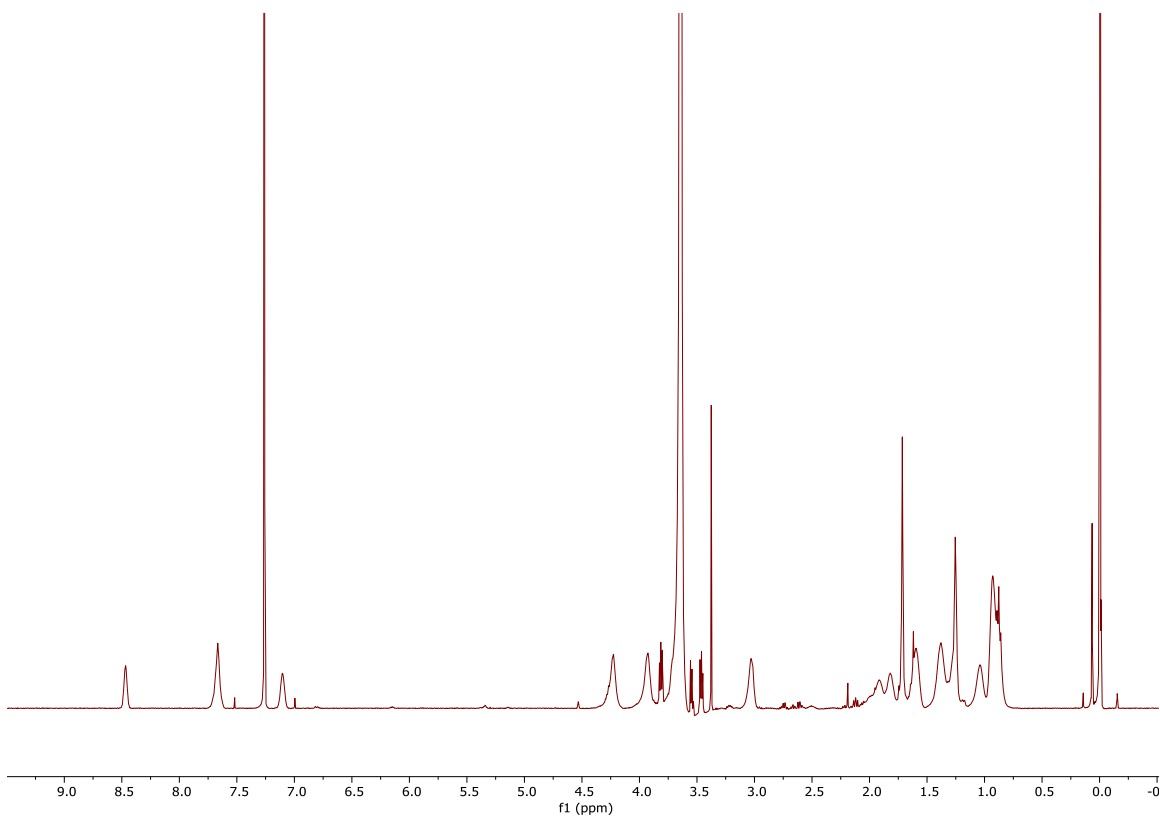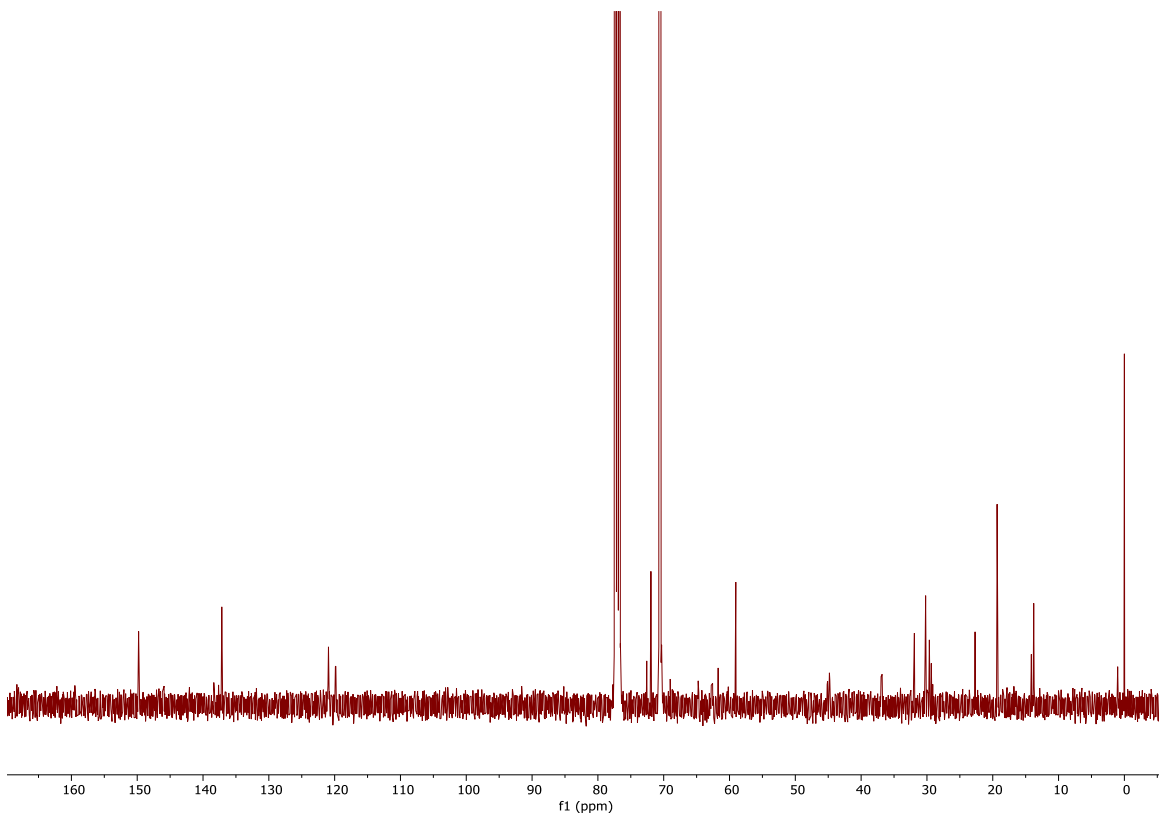

PBu<sub>80</sub> <sup>1</sup>H NMR and <sup>13</sup>C NMR

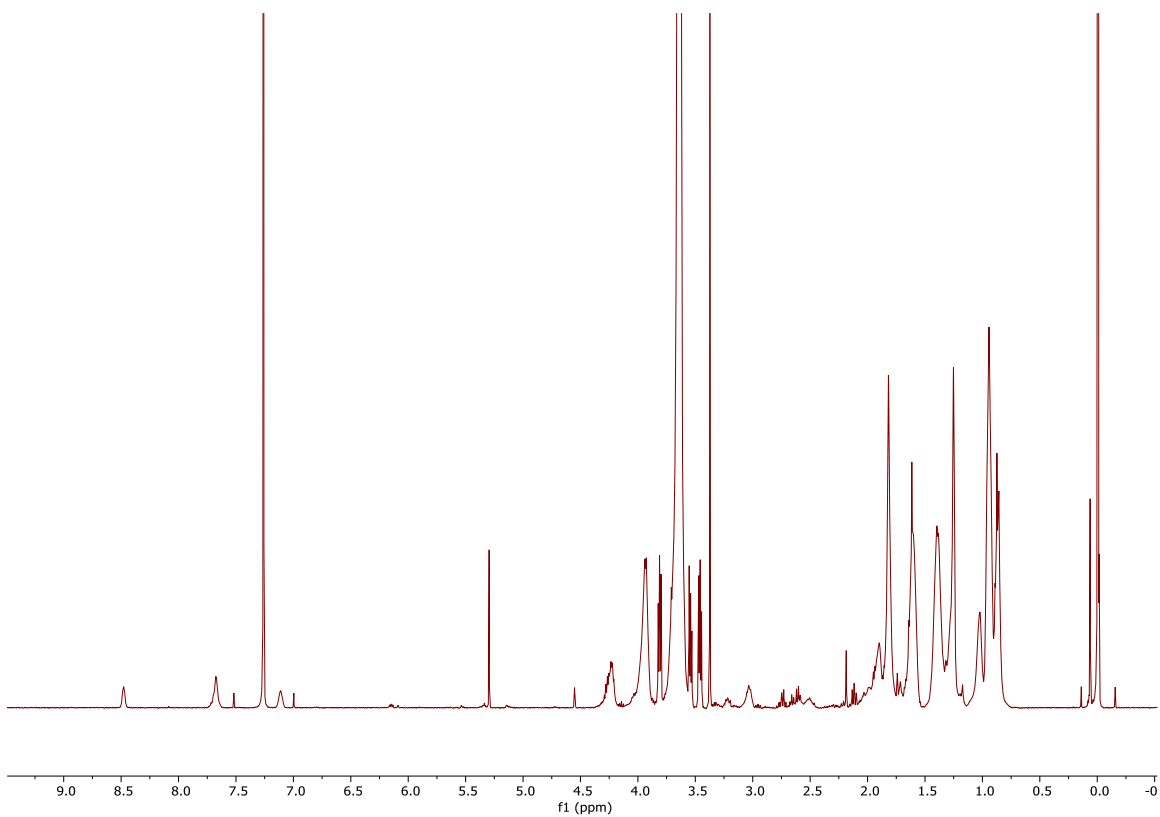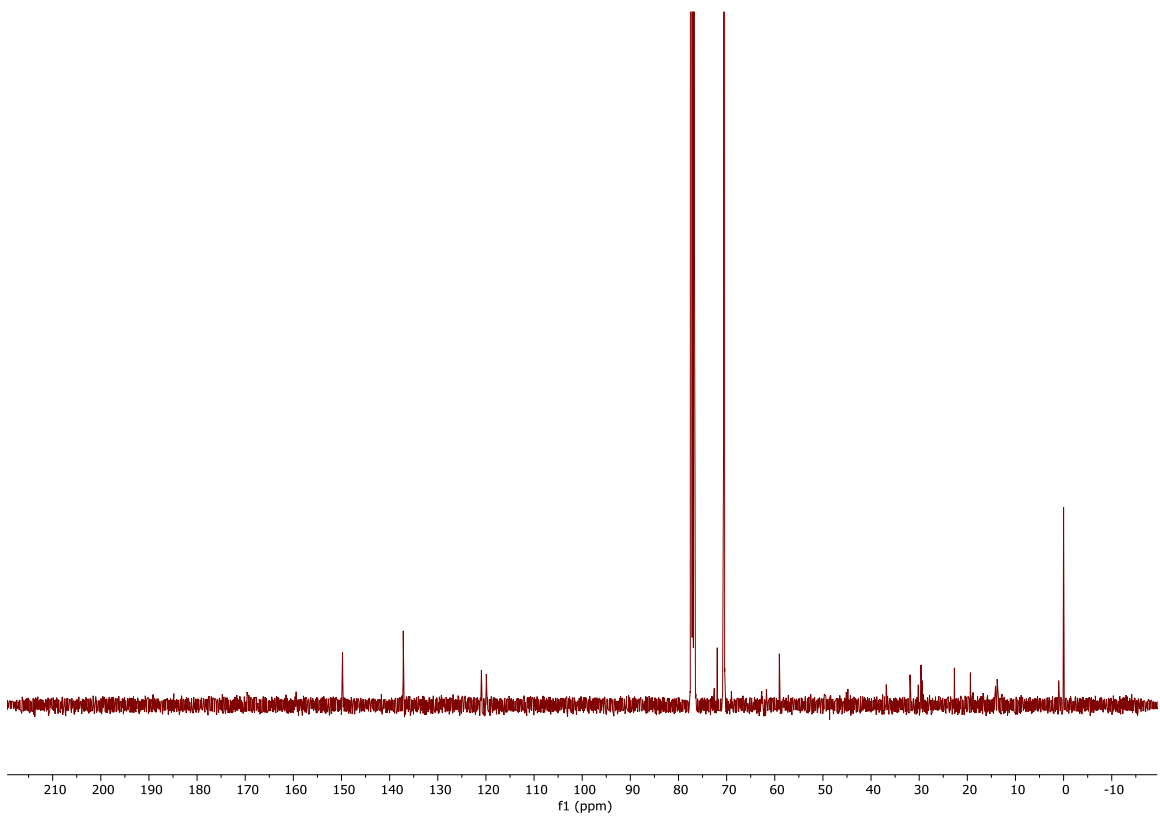

Supplement: NIHMS1769614-supplement-Supporting_Information.pdf [file NIHMS1769614-supplement-Supporting_Information.pdf]
